# **1Application of seaweed organic components increases tolerance to Fe**

## **2deficiency in tomato plants**

**3Sandra Carrasco-Gil<sup>(ID)</sup>\*, Raúl Allende-Montalbán, Lourdes Hernández-Apaolaza,**  
**4Juan José Lucena\*.**

5Department of Agricultural Chemistry and Food Science. Universidad Autónoma de  
6Madrid, Av. Francisco Tomás y Valiente 7, 28049 Madrid, Spain

7\*[sandra.carrasco@uam.es](mailto:sandra.carrasco@uam.es) (S. Carrasco-Gil); [juanjose.lucena@uam.es](mailto:juanjose.lucena@uam.es) (JJ Lucena)

8

## 9Abstract

10The beneficial effects of seaweed extracts have been related to plant growth regulators  
 11present in seaweeds. However, algae extracts comprise other organic compounds such as  
 12phenols, mannitol, alginates, laminarins and fucoidans that may have a relevant role  
 13regarding abiotic stress tolerance due to Fe deficiency. Therefore, we evaluated the  
 14individual effect of these organic compounds on the mitigation of Fe deficiency applying a  
 15range of concentrations (x1/10, x1, x10) in agar Petri dishes (in tomato seeds) and in the  
 16nutrient solution of a hydroponic system (tomato plants). Germination and plant growth  
 17promotion, root morphology, chlorophyll content and antioxidant activity were determined.  
 18Results showed that the lowest concentration x1/10 and phenolics, laminarin and fucose  
 19compounds contributed to increase the tolerance to Fe deficiency in tomato plants.

20

21**Keywords:** tomato; iron-deficiency; phenolic compounds; laminarin; fucose; sodium  
 22alginate; mannitol.

23

24**Abbreviations:** seaweed extract (SWE), salicylic acid (SA), gallic acid (GA), sodium  
 25alginate (SoA), mannitol (MA), laminarin (LA) and fucose (FU)

## 26Introduction

27The use of commercial seaweed extracts (SWEs) in agriculture is an increasingly  
 28widespread practice, since these products may enhance the plant growth development and  
 29the tolerance to abiotic stresses, which are increasing due to climate change [1-3].  
 30However, the information on the mode of action of these extracts is scarce. This fact, along  
 31with the high variability in the composition of these products, may reduce the confidence  
 32that farmers have on the SWEs formulations. Different research works that studied SWEs  
 33obtained from the same type of seaweed source (as example *A. nodosum*), showed different  
 34results [4] probably due to the variability in the composition among batches, extraction  
 35process used for their manufacturing, and the doses, frequency and time of application to  
 36crops.

37The forthcoming Europe legislation regarding fertilizer products (*REGULATION OF THE*  
 38*EUROPEAN PARLIAMENT AND OF THE COUNCIL laying down rules on the making*  
 39*available on the market of CE marked fertilising products and amending Regulations (EC)*  
 40*No 1069/2009 and (EC) No 1107/2009*) does not establish requirements regarding algae  
 41extract components, except the maximum allowed concentration of several contaminants  
 42that may be present in algae extract products. However, algae extracts comprise many  
 43organic compounds such as betaines, proteins, phenols, vitamins, vitamin precursors, plant  
 44growth regulators, mannitol, alginates, laminarins and fucoidans [5], which are not taken  
 45into account in the proposed EC regulation, and that may have a relevant role regarding  
 46growth promotion and abiotic stress tolerance.

47The European Food Safety Authority [6] has related alginates, fucoidan and mannitol to  
 48the effects of SWE, mainly because these compounds make up the majority of the organic  
 49composition of these extracts. Alginates can improve soil conditions promoting the

50formation of aggregates between soil particles and, therefore, increasing the absorption and  
51translocation of nutrients [7,8], root growth and soil microbial activity [9]. Mannitol has  
52several functions within plant systems, being able to act as a reserve carbohydrate [10] or  
53as a protective agent against reactive oxygen species (ROS) [11]. Some authors have  
54observed an increase in enzymatic antioxidant activity after the application of mannitol in  
55plants under salt stress [12]. In addition, the application of mannitol can improve the  
56protection of the roots against lipid peroxidation [13]. Fucoidans may promote the  
57antioxidant activity [14,15], although it has not yet been tested on plants. However, there  
58are also other organic compounds such as phenolics or laminarin, relatively abundant in the  
59SWEs whose presence has been related to some of its effects. The phenolic compounds are  
60particularly abundant in brown seaweed and are known for their antioxidant activity.  
61Among the phenolic compounds, salicylic acid (SA) can alleviate the effects caused by  
62various abiotic stress factors, such as extreme heat [16], soil salinity [17,18] or drought  
63[19]. Gallic acid (GA) is another important phenolic compound, which improved the plant  
64tolerance to abiotic stress such as soil salinity [20], ozone exposure [21] and low  
65temperature [22]. Laminarin can account for 0-33% of the total dry weight of the marine  
66algae used in SWE production [23]. Laminarin can modulate the antioxidant system of  
67chloroplasts in situations of abiotic stress [24].

68There is scarce information about the effect of SWEs on nutrient deficiency. Several  
69studies revealed that SWE application might stimulate nutrient uptake and translocation in  
70plants [25-28]. Iron (Fe) is an essential nutrient in plant nutrition that is involved in  
71chlorophyll (Chl) synthesis, in electron transport photosynthesis, DNA or hormone  
72synthesis and N-fixation process [29]. Iron can also act as a cofactor within many  
73antioxidant enzymes, such as catalase (CAT) and superoxide dismutase (SOD), which are  
74responsible for protection against reactive oxygen species (ROS) production [30,31]. A

low Fe availability, especially in calcareous soils with alkaline pH, results in a reduction of plant productivity and quality [32]. Nutrient imbalances such as Fe deficiency may be alleviated by the use of SWE products, enhancing the defense mechanism to reduce the oxidative stress and the chlorosis. Moreover, the addition of SWEs may promote the root development and the photosynthesis, improving the nutrient uptake.

Therefore, the objective of this work was to study the effect of individual application of organic components present in the algae extracts on: (1) plant growth development and (2) mitigation of abiotic stress due to Fe deficiency (nutrient imbalance). Also, (3) identify the concentration range at which these compounds may have positive effects. This work will contribute to scientific basis for establishing criteria for the production, use, and regulation of new seaweed extract products, which guarantee farmers the benefits indicated on the label package of these type of products.

## Material and Methods

### Organic compounds

A set of organic compounds present in SWEs that have been related to the beneficial effects of the SWE application in agriculture by several authors (see introduction section) were selected: Fucose (L-(-)-Fucose, Sigma-Aldrich) that is the fundamental sub-unit of the fucoidan; alginic acid polysaccharide (alginic acid sodium salt, Sigma-Aldrich), laminarin polysaccharide (from *Laminaria digitate*, Sigma-Aldrich); mannitol that is a sugar alcohol (D-Mannitol, Merck); salicylic acid (Panreac) and gallic acid (Sigma-Aldrich) that are phenolic compounds. The organic compounds were applied at three concentrations x1/10, x1, x10 (Table 1). The concentration x1/10 (1/10-fold with respect to x1) and x10 (10-fold with respect to x1). The concentration x1 was calculated based on the concentration of these organic compounds in commercial SWEs of *A. nodosum* [4,33] and

the average dose of application (by root) of commercial SWEs for tomato plants. Control treatment without any organic compound application was also performed.

# **Germination assay in Petri dish**

Firstly, sterilized Petri dishes were prepared for seed germination adding individually the organic compounds (SA, GA, SoA, MA, LA, FU) at three concentrations (x1/10, x1 and x10; see Table 1) in 1.5% (w/v) plant agar (Duchefa Biochemia, Haarlem, Netherlands). Tomato seeds (*Solanum lycopersicum* L. Moneymaker) were surface sterilized, vernalized at 4 °C for 24 h in darkness and placed on Petri dishes (8 seeds per Petri dish) with the respective organic compounds treatments and concentrations. Control treatment without any organic compound application was also performed. The sowing was carried out in a laminar air flow cabinet to avoid bacterial contamination. Petri dishes were placed in vertical position with a slight inclination for 7 days in a growth chamber with a photosynthetic photon flux density at leaf height of 1000  $\mu\text{mol m}^{-2} \text{s}^{-1}$  photosynthetically active radiation, 16-h, 25 °C, 40% humidity/ 8-h, 20 °C, 60% humidity day/night regime. A total of 2 Petri dishes per treatment and concentration was performed. The germination percentage (%) was measured at day 2 and the growth promotion (+%) or growth inhibition (-%) root seedlings at day 3, 4, 5 and 7 after sowing. The growth promotion and growth inhibition were calculated as follow:

$$\text{Growth (\%)} = [(\text{treated root length} - \text{control root length}) / \text{control root length}] \times 100$$

# **Plant material and growth conditions**

Tomato (*Solanum lycopersicum* cv. Moneymaker) plants were grown in a growth chamber with a photosynthetic photon flux density at leaf height of 1000  $\mu\text{mol m}^{-2} \text{s}^{-1}$  photosynthetically active radiation, 16-h, 25 °C, 40% humidity/ 8-h, 20 °C, 60% humidity

122day/night regime. Seeds were surface sterilized and germinated in vermiculite for 16 days  
 123in 1/20 diluted Hoagland nutrient solution in distilled water. Seedlings were pre-adapted to  
 124hydroponic system in 10-L boxes (28 plants per box) in 1/5 diluted Hoagland nutrient  
 125solution with 20  $\mu\text{M}$  Fe and pH 6.0 during nine days. Plants were then transferred to 100  
 126mL plastic pots (one plant per pot) and grown in completed Hoagland solution containing  
 127in mM: 7.5  $\text{NO}_3^-$ , 1.0  $\text{H}_2\text{PO}_4^-$ , 1.05  $\text{SO}_4^{2-}$ , 3.5  $\text{K}^+$ , 2.5  $\text{Ca}^{2+}$ , 1  $\text{Mg}^{2+}$ ; and in  $\mu\text{M}$ : 23.2 B, 4.6  
 128 $\text{Mn}^{2+}$ , 1.2  $\text{Zn}^{2+}$ , 0.18  $\text{Cu}^{2+}$ , 4.6  $\text{Cl}^-$ , 0.12  $\text{Na}^+$ , 0.12  $\text{MoO}_4^{2-}$  with 20  $\mu\text{M}$  Fe-HBED (Fe(III)-  
 129ácido N,N'-bis(2-hidroxibencil)etilendiamino-N,N'-diacético) during 10 days. The pH was  
 130fixed at around 7.5 by the addition of 0.1 mM HEPES and 0.1 g/L  $\text{CaCO}_3$  to simulate  
 131calcareous conditions. The nutrient solution was renewed every 5 days. After that, plants  
 132were transferred to 300 mL plastic pots and Fe deficiency was induced removing the Fe-  
 133HBED from the nutrient solution with a pH of 7.5 during 6 days.

134Organic compounds treatments (salicylic acid (SA), gallic acid (GA), sodium alginate  
 135(SoA), mannitol (MA), laminarin (LA) and fucose (FU)) were applied three times during  
 136the experiment at two different concentrations ( $x1/10$  and  $x1$ ). The concentration  $x10$   
 137produced inhibition of germination and growth development in seedling during the Petri  
 138dish assay, so that concentration was dismissed in hydroponic experiment. First application  
 139of the organic compounds was the first day of growth period with completed Hoagland  
 140solution, the second application was after five days of growth period with the renewal of  
 141nutrient solution, and the third application was at the beginning of Fe-deficient period. A  
 142control treatment without organic compound application was also performed. A total of 4  
 143pots per treatment and concentration were used.

#### 144Plant analysis

The morphology of tomato roots treated with the organic compounds was analysed in Fe sufficiency and after 6 days of Fe deficiency. Fresh roots were washed and blotted with filter paper. Then, root tips and root pieces (3 cm length) cut at five cm from the root tip were mounted on microscope glass slides and analysed by a stereomicroscope (Leica MZ12.5, Wetzlar, Germany) connected to a video camera (Olympus UC30, Tokyo, Japan). Leaf chlorophyll index was assessed at day 0, 3 and 5 of Fe deficiency using a SPAD 502 apparatus (Minolta Co., Osaka, Japan) after applying the organic compounds at two concentrations. Data was the average of five measurements of new leaf levels during the Fe-deficient period in a total of four plants per treatment. At the end of the experiment, after 6 days of Fe deficiency, plants (41 day-old) were collected and washed with distilled water. Then, the plant material was divided in root, stem, developed leaves and new leaves and fresh weight (FW) was determined. After that, plant material was stored at -80°C for oxidative stress analysis. Enzymes were extracted from 0.1 g of intact frozen roots and leaves with 1 mL extraction solution, freshly prepared containing 50 mM potassium phosphate buffer at pH 7.8, 2 mM Na<sub>2</sub>-EDTA (ethylene diamine tetraacetic acid), 10 mM DTT (1,4-Dithiothreitol), 20 mM ascorbic acid, 0.6% PVPP (polyvinyl polypyrrolidone) and 50 µl protease inhibitors cocktail. The extracts were centrifuged at 14,000 × g for 15 min at 4°C, and the supernatants were used for the enzymatic assays. Total superoxide dismutase activity (SOD; EC 1.15.1.1) was assayed according to Giannopolitis and Ries [34] with some modifications. Briefly, 300 µl reaction mixture containing 50 mM potassium phosphate buffer pH 7.8, 0.1 mM Na<sub>2</sub>-EDTA, 13 mM methionine, 2 mM riboflavine and 75 mM NBT (nitroblue tetrazolium) were added to 10 µl of crude extract in a microplate. The reaction started by exposing the mixture to cool white fluorescent light and absorbance at 560 nm was measured at 0, 15 and 30 min using a spectrophotometer (Spectro start nano, BMG Labtech, Germany). One unit of SOD activity was defined as the



amount of enzyme that causes 50% NBT reduction by superoxide radicals, and the specific activity was expressed as units  $\text{mg}^{-1}$  of protein. Catalase activity (CAT, EC 1.11.1.6) was determined according to Aebi [35] with some modifications. CAT activity was assayed in a 3 mL reaction volume at 25 °C by adding 0.1 mL of diluted extract to a solution containing 50 mM phosphate buffer pH 7.0 and 10 mM  $\text{H}_2\text{O}_2$ . The activity was measured by monitoring the decrease in absorbance at 240 nm as a consequence of  $\text{H}_2\text{O}_2$  consumption using a spectrophotometer (Spectro start nano, BMG Labtech, Germany). Activity was expressed as units (mmol of  $\text{H}_2\text{O}_2$  decomposed per minute) per mg of protein.

## Statistical analyses

Statistical analysis was carried out with SPSS for Windows (v. 21.0), using a Levene test for checking homogeneity of variances, and ANOVA or Welch's tests ( $p < 0.10$ ) were performed. *Post hoc* multiple comparisons of means were carried out using Duncan's or Games-Howell's test ( $p < 0.10$ ) as appropriate.

## Results

### Germination assay in Petri dish

In general, the individual application of the organic compounds at different concentration ( $x1/10$ ,  $x1$  and  $x10$ ) in tomato seeds showed a higher germination (>6-37 %) with respect to untreated control, except in the case of SA ( $x1$  and  $x10$ ) and SoA ( $x1$ ) that was similar to untreated control (Table 2). The GA ( $x1/10$ ) treatment showed the highest germination (37%) compared to the control, followed by GA ( $x1$ ), SoA ( $x10$ ), MA ( $x1$  and  $x10$ ) with a 25% of germination. After the seed sowing and organic compounds application, length of root seedlings was measured at day 3, 4, 5 and 7, and compared to the control. The growth promotion and growth inhibition were calculated. The application of organic compounds

193 promoted the root growth during the 7 days compared to the control, with the exception of  
194 SA (x10), GA (x10) and FU (x1/10) that inhibited the root growth (Fig 1). At day 3, GA  
195 (x1/10; x1) and LA (x1/10) significantly increased the root length (>40%), but SA (x10)  
196 treatment totally inhibited the root growth compared to the control. At day 4 and 5, SA  
197 (x10) maintained almost total inhibition of root growth compared to the control, and at day  
198 7, SA (x10) and also GA (x10) inhibited the root growth (80% and 40% respectively) with  
199 respect to the control.

## 200 Fresh weight

201 The FW of root, stem, developed leaves and new leaves was determined after six days of  
202 Fe deficiency. The root FW was significantly increased with SA, GA, MA, LA, FU (x1/10)  
203 and SoA, MA (x1) compared to the untreated control (Fig 2). The stem FW was  
204 significantly increased with SA, GA, LA and FU (x1/10) compared to the untreated  
205 control. The developed leaves FW was significantly increased with GA, LA and FU  
206 (x1/10) compared to the untreated control. And new leaves FW was significantly increased  
207 with all organic compounds (x1/10) and SA, SoA and MA (x1) compared to the untreated  
208 control.

## 209 Morphology of tomato roots

210 The morphology of roots treated with organic compounds was evaluated in Fe sufficiency  
211 and after 6 days of Fe deficiency compared to untreated control (Fig 3). Under Fe  
212 sufficiency, GA, MA (x1) and GA (x1/10) treatments increased the development of root  
213 hairs. However SA, GA, MA, FU (x1) and SoA, MA, LA (x1/10) treatments decreased the  
214 length of secondary roots with respect to the untreated control. After 6 days of Fe  
215 deficiency, LA (x1/10) treatment increased the length of secondary roots, but SoA (x1/10)  
216 and GA, LA, FU (x1) decreased the length of secondary roots with respect to the untreated

control. Also SA, GA, SoA, MA, FU (x1) and GA, LA, FU (x1/10) treatments increased the development of root hairs with respect to the control. SoA, MA, FU (x1) and SA, SoA, MA, LA (x1/10) treatments increased the distance between secondary roots compared to the control.

## Leaf chlorophyll index

During Fe sufficiency, LA (x1/10) and SA (x1) significantly decreased the chlorophyll index compared to the untreated control, but the rest of treatments maintained the chlorophyll index similar to the control (Fig 4). During Fe deficiency, GA (x1/10) and LA (x1) significantly decreased the chlorophyll index compared to the untreated control at day 63, but FU (x1/10; x1) significantly increased the chlorophyll index compared to the untreated control at day 5 of Fe deficiency.

## Oxidative stress parameters

The oxidative stress was measured in roots and new developed leaves after six days of Fe deficiency by the determination of SOD and CAT activity. Neither of organic compounds treatments increased the SOD activity in root and new leaves, but SA, GA, SoA and LA (x1) significantly decreased the SOD activity in new leaves compared to the untreated control (Fig 5). Moreover, GA and FU (x1/10) in root, and GA (x1/10) in new developed leaves increased the CAT activity with respect to the control. However, neither of organic compounds treatments significantly decreased the CAT activity in root and new leaves compared to the untreated control.

## Discussion

Seaweed extract application may improve germination and plant growth development [36,37]. This promotion effect may be caused not only by phytohormones, but also by

other compounds present in SWEs [5,38]. In fact, all organic compounds applied at different concentrations (x1/10, x1 and x10) in tomato seeds significantly increased the germination with respect to untreated control, except in the case of SA (x1 and x10) and SoA (x1). It has been reported that the positive effect of these compounds depends on the concentration applied. In an experiment with bean seedlings, the application of 0.1 mM SA (14 mg/L) inhibited germination and initial growth, but SA concentrations lower than 0.025 mM (3.4 mg/L) had a positive effect [39]. This study was in agreement with the obtained data, where the application of 47 and 470 mg/L SA (x1 and x10 respectively) inhibited the germination and the initial growth of tomato seedlings. Other example that showed the effect of concentration was the GA treatments, since the germination and the root length at day 3 increased as the concentration of GA applied decreased (470-47-4.7 mg/L). Similar results were found in a study that investigated the dose-response effect of GA on root growth in *Arabidopsis thaliana* at different concentrations 0, 150, 250, 500 and 1000  $\mu$ M, where the highest concentrations of GA showed the lowest growth promotion (only 25%) [40]. SoA (x1/10 and x10) applications increased the germination, and also SoA (x1/10 and x1) promoted the root growth between 10 and 30% during 5 days in tomato seedlings. In concordance with the presented data, it has been reported that alginate derived oligosaccharides enhanced seed germination in maize [41], and increased the root growth in barley [42], lettuce [43] carrot and rice [44]. All MA treatments increased the germination and also MA (x1 and x10) enhanced, but not significantly, the root length until day 5 of growth. Contrary with our results, Johnson and Kane [45] indicated that MA application did not improve the germination in pine-pink seeds, and even very high concentration (7-9% (w/v)) inhibited the seed germination in celery plants by causing osmotic stress [46]. LA treatments enhanced the seed germination and also LA (x1/10 and x10) increased the root length, especially after 3 days of growth. Some authors indicated

that LA might be used as a seed germination and plant growth accelerator in many plants [47]. FU treatments showed a very slight increase in seed germination, and except FU (x1/10), FU did not promote the root growth compared to the control. Stevenson and Harrington [48] applied FU in *Arabidopsis thaliana* seeds and showed a significant decrease in the hypocotyl and root length.

Regarding fresh weight, the lowest concentration (x1/10) increased the number of organic compounds that had a positive effect on biomass after six days of Fe deficiency. In fact, the concentration x1/10 of all organic compounds significantly increased the biomass of new leaves and roots (except SoA that only increased the root FW with the concentration x1). Moreover, GA, LA and FU at concentration x1/10 (4.7, 0.07 and 3.1 mg/L respectively) significantly increased the FW of all organs of the plant. Several studies reported positive effects on plant biomass under abiotic stress conditions after the application of SA, GA, SoA, MA, and LA, although none with respect to nutrient imbalance. Related to this, SA application at different concentrations, 0.5 mM (69 mg/L) in seeds of wheat [49], 100-300 mg/L sprayed in rosemary leaves [50] or 0.7-1.4 mM (96-193 mg/L) sprayed in sunflower [51] with high salinity showed a significant increase in FW. Applications in the nutrient solution of 1-2 mM (170-240 mg/L) GA in soybean under low temperatures [22] or applications of 0.75-1 mM (127-255 mg /L) GA in rice under salinity [20] increased the relative growth rate compared to the control. In the case of SoA, previous soaking of wheat seeds with 1000 mg/L alginate-derived oligosaccharide under cadmium toxicity [52] and 1000 mg/L alginate-derived oligosaccharide sprayed in rice plants under water stress [53], enhanced the FW. Application of 100 mM ( $1.82 \times 10^4$  mg/L) MA in the nutrient solution of wheat seedling with high salinity increased the root dry weight [12] and application of 15-30 mM ( $2.7 \times 10^3$  –  $5.4 \times 10^3$  mg/L) MA by spray in maize leaves with high salinity increased the root and shoot dry weight [54]. Application of 25 mg/L LA in a growth

290medium under salt and heat stress showed an increase of *Arabidopsis thaliana* Col-0 FW  
291[24]. As far as we know, the evaluation of FU application on plant biomass has been not  
292described in the literature.

293Iron deficiency induce root morphological alterations that results in a greater formation of  
294root hairs [55] and secondary roots, a shorter length of the lateral roots [56], a decrease of  
295the distance between secondary roots [57] and a thickening of root tips [56,58]. Under Fe  
296deficiency, LA (x1/10) increased the length of secondary roots with respect to the  
297untreated deficient control. Moreover, SA, GA, SoA, MA, FU (x1) and GA, LA, FU  
298(x1/10) treatments increased the formation of root hairs under Fe deficiency, some of them  
299(GA, MA (x1) and GA (x1/10)) even under sufficient conditions compared to the control.  
300Related to this, some authors showed an increase of secondary roots formation after the  
301application of seaweed extracts in *Arabidopsis thaliana* [5], grapevine [59] and strawberry  
302[37]. This result suggests that the application of these organic compounds may contribute  
303to the improvement of Fe availability, regulating the morphological adaptive responses of  
304roots to Fe deficient conditions.

305Despite several studies reported that the application of SWEs increased the chlorophyll  
306content [5,26,60,61], others did not. For example, Carrasco-Gil et al. [62] did not obtained  
307any change in the chlorophyll content after applying commercial SWEs to tomato plants  
308after 7 days of Fe deficiency, and suggested that the application doses should be increased  
309for attenuating chlorosis symptoms. In the present study, GA x1/10 (4.7 mg/L) and LA x1  
310(0.7 mg/L) significantly decreased the chlorophyll index of new leaves compared to the  
311untreated control after three days of Fe deficiency. Contrary to these results, application of  
31260 mg/L GA in rice under healthy conditions [63] and 0.5 mg/L LA in tobacco under biotic  
313stress [64] showed an increase of chlorophyll content or prevent chlorophyll depletion

314 compared to the untreated control. However, FU x1/10 (3.1 mg/L) and FU x1 (31 mg/L)  
315 significantly increased the chlorophyll index of new leaves compared to the untreated  
316 control after five days of Fe deficiency, suggesting that fucoidans may increase the  
317 antioxidant activity reducing the chlorophyll degradation. As far as we know, no literature  
318 is available at this respect.

319 Iron deficiency enhanced the production of reactive oxygen species (ROS) in plants  
320 [65,66]. However, the role of ROS in Fe response regulation has not been well defined,  
321 and it may play multiple roles [67]. Plants have an enzymatic antioxidant system for  
322 scavenging the ROS excess and prevent damages to cells [68]. Superoxide dismutase  
323 (SOD), and catalase (CAT) are the first enzymes in the detoxification pathway and contain  
324 Fe in heme (CAT) and non-heme (Fe-SODs) form. Iron deficiency in plants increased total  
325 SOD activity (decreasing Fe-SOD and increasing CuZn-SOD and Mn-SOD), and reduced  
326 CAT activity since the synthesis of these enzyme is inhibited [66,69-71]. Several studies  
327 reported an increase of total SOD activity in leaves after the application of seaweed  
328 extracts in healthy plants [72], in Fe deficient plants [62] and in drought or water stressed  
329 plants [74,75]. In the present work, total SOD activity significantly decreased in Fe  
330 deficient tomato leaves after the application of SA, GA, SoA and LA (x1; 47, 47, 90 mg/L  
331 respectively) compared to untreated leaves. It could be possible that these compounds at  
332 concentration x1 balanced the ROS production (superoxide radical;  $O_2^{\bullet-}$ ), decreasing total  
333 SOD activity. Contrary to the results obtained, several authors reported an increase of total  
334 SOD activity after the application of GA and SoA in plants. Application of 1-2 mM (170-  
335 240 mg/L) GA in soybean grown in normal and cold stressed condition [22] and the  
336 application of 1000 mg/L alginate derived oligosaccharides in wheat grown in normal,  
337 drought and Cd stressed conditions [52,53], increased the SOD activity. In the case of SA,  
338 contradictory results have been found. Some studies showed an increase of total SOD

activity in leaves after the application of 0.1-0.5 mM (14-69 mg/L) SA in root or leaves respectively of Fe deficient peanut [76] or 0.5 mM SA in soybean roots under arsenic toxicity [77]. However, other studies reported that 0.5 mM SA applied in maize plants under low temperatures did not affect the SOD activity [78,79], and even high concentrations of SA (2.5 mM; 345 mg/L) applied in wheat seedlings decreased total SOD activity [73]. On the other hand, CAT activity decreased in Fe deficient plants. However, application of SA, GA and FU x1/10 significantly increased the CAT activity in roots compared to Fe deficient control. Similar results were reported in salt stressed rosemary plants where the application of SA (100-300 mg/L) increased CAT activity [50]. The CAT enzyme catalyze the decomposition of hydrogen peroxide (H<sub>2</sub>O<sub>2</sub>) into oxygen and water [30]. Some authors reported a decrease of H<sub>2</sub>O<sub>2</sub> in plants grown in salt [20] and cold [22] stressed condition after the application of GA suggesting an increase of CAT activity. Therefore, these phenolic compounds at concentration x1/10 may improve the antioxidant system enhancing the plant tolerance to Fe deficient stress. As far as we know, direct effects of fucoidan on plants have not yet been reported.

## Conclusions

In summary, the results of this research point out the importance of the concentration applied and the type of organic compounds present in a SWE in relation to its effectiveness to enhance the tolerance to iron deficiency (nutrient imbalance). The lowest concentration x1/10 of organic compounds showed the best results regarding growth promotion seedlings, fresh weight, secondary root elongation, chlorophyll content and CAT antioxidant activity. Moreover, from among all organic compounds evaluated, the phenolic compounds (salicylic acid and gallic acid), laminarin and fucose contributed in a greater extent to increase the tolerance to Fe deficiency in tomato plants. Although, it is necessary



to carry out more studies in this regard, since it is possible that the effects of the algae extracts are not only due to the presence of discrete compounds, but the synergy produced by the interaction between them. It would also be of interest to test these compounds on other crops and substrates. In addition, experiments must be carried out to establish the optimal application times for these compounds, both in relation to the vegetative phase and the frequency of application. The achievement of these studies would be of great importance to establish greater control over the existing marine algae extracts, as well as to develop second generation algae extracts, designed with specific compositions for the needs of each crop.

## **Funding**

Authors gratefully acknowledge the financial support by Spanish Ministry of Economy and Competitiveness project: AGL2013-44474-R.

## **Conflict of Interest**

The authors declare that the research was conducted in the absence of any commercial or financial relationships that could be construed as a potential conflict of interest

## **Contributions**

Conceptualization: SCG, JJJ. Metodology: SCG. Formal Analysis: SCG, RAM. Investigation: SCG, RAM. Writing-Original Draft: SCG, RAM. Formal analysis: SCG, RAM. Validation: LHA, JJJ. Writing-Review and Editing: SCG, LHA, JJJ. Funding Acquisition: LHA, JJJ. Supervision: JJJ.

## **References**

1. Sangha JS, Kelloway S, Critchley AT, Prithiviraj B. Seaweeds (Macroalgae) and

- 385 their extracts as contributors of plant productivity and quality: the current status of  
386 our understanding. Adv Bot Res. 2014 Jan 1;71:189–219.
3872. Arioli T, Mattner SW, Winberg PC. Applications of seaweed extracts in Australian  
388 agriculture: past, present and future. J Appl Phycol. 2015 Oct 14;27(5):2007–15.
3893. Battacharyya D, Babgohari MZ, Rathor P, Prithiviraj B. Seaweed extracts as  
390 biostimulants in horticulture. Sci Hortic (Amsterdam). 2015 Nov 30;196:39–48.
3914. Rayorath P, Jithesh MN, Farid A, Khan W, Palanisamy R, Hankins SD, et al. Rapid  
392 bioassays to evaluate the plant growth promoting activity of *Ascophyllum nodosum*  
393 (L.) Le Jol. using a model plant, *Arabidopsis thaliana* (L.) Heynh. J Appl Phycol.  
394 2008 Aug 4;20(4):423–9.
3955. E.F.S.A. Conclusion on the peer review of the pesticide risk assessment of the active  
396 substance sea-algae extract. Vol. 10, EFSA Journal. 2012.
3976. Khan W, Zhai R, Souleimanov A, Critchley AT, Smith DL, Prithiviraj B.  
398 commercial extract of *Ascophyllum nodosum* improves root colonization of alfalfa  
399 by its bacterial symbiont *Sinorhizobium meliloti*. Commun Soil Sci Plant Anal. 2012  
400 Oct;43(18):2425–36.
4017. González A, Castro J, Vera J, Moenne A. Seaweed oligosaccharides stimulate plant  
402 growth by enhancing carbon and nitrogen assimilation, basal metabolism, and cell  
403 division. J Plant Growth Regul. 2013 Jun 11;32(2):443–8.
4048. Chen S-K, Edwards CA, Subler S. The influence of two agricultural biostimulants  
405 on nitrogen transformations, microbial activity, and plant growth in soil  
406 microcosms. Soil Biol Biochem. 2003 Jan 1;35(1):9–19.
4079. Lewis DH. Storage carbohydrates in vascular plants: Distribution, physiology and  
408 metabolism. In: Lewis DH, editor. Physiology and metabolism of alditols.  
409 Cambridge: Cambridge University Press; 1984. p. 157–79.
41010. Meena M, Prasad V, Zehra A, Gupta VK, Upadhyay RS. Mannitol metabolism  
411 during pathogenic fungal–host interactions under stressed conditions. Front  
412 Microbiol. 2015 Sep 24;6:1019.
41311. Seckin B, Sekmen AH, Türkan İ. An enhancing effect of exogenous mannitol on the  
414 antioxidant enzyme activities in roots of wheat under salt stress. J Plant Growth  
415 Regul. 2009 Mar 15;28(1):12–20.
41612. Will S, Eichert T, Fernández V, Möhring J, Müller T, Römhelt V. Absorption and  
417 mobility of foliar-applied boron in soybean as affected by plant boron status and  
418 application as a polyol complex. Plant Soil. 2011 Jul 25;344(1–2):283–93.
41913. Lim SJ, Wan Aida WM, Maskat MY, Mamot S, Ropien J, Mazita Mohd D. Isolation  
420 and antioxidant capacity of fucoidan from selected Malaysian seaweeds. Food  
421 Hydrocoll. 2014 Dec 15;42:280–8.
42214. Hifney AF, Fawzy MA, Abdel-Gawad KM, Gomaa M. Industrial optimization of  
423 fucoidan extraction from *Sargassum* sp. and its potential antioxidant and  
424 emulsifying activities. Food Hydrocoll. 2016 Mar 1;54:77–88.
42515. Zhang CX, Feng BH, Chen TT, Zhang XF, Tao LX, Fu GF. Sugars, antioxidant  
426 enzymes and IAA mediate salicylic acid to prevent rice spikelet degeneration caused

- 427 by heat stress. *Plant Growth Regul.* 2017 Nov 13;83(2):313–23.
42816. Ahmad F, Singh A, Kamal A. Ameliorative effect of salicylic acid in salinity  
429 stressed *Pisum sativum* by improving growth parameters, activating photosynthesis  
430 and enhancing antioxidant defense system. *Biotechnol Commun Biosci Biotech Res*  
431 *Comm.* 2017;10(3):481–9.
43217. Kim Y, Kim S, Shim IS. Exogenous salicylic acid alleviates salt-stress damage in  
433 cucumber under moderate nitrogen conditions by controlling endogenous salicylic  
434 acid levels. *Hortic Environ Biotechnol.* 2017 Jun 24;58(3):247–53.
43518. Silva AC da, Suassuna JF, Melo AS de, Costa RR, Andrade WL de, Silva DC da.  
436 Salicylic acid as attenuator of drought stress on germination and initial development  
437 of sesame. *Rev Bras Eng Agrícola e Ambient.* 2017 Mar;21(3):156–62.
43819. Ozfidan-Konakci C, Yildiztugay E, Kucukoduk M. Protective roles of exogenously  
439 applied gallic acid in *Oryza sativa* subjected to salt and osmotic stresses: effects on  
440 the total antioxidant capacity. *Plant Growth Regul.* 2015 Jan 13;75(1):219–34.
44120. Rudolphi-Skórska E, Sieprawska A. Adaptation of wheat cells to short-term ozone  
442 stress: the impact of  $\alpha$ -tocopherol and gallic acid on natural and model membranes.  
443 *Acta Physiol Plant.* 2016 Apr 14;38(4):85.
44421. Yildiztugay E, Ozfidan-Konakci C, Kucukoduk M. Improvement of cold stress  
445 resistance via free radical scavenging ability and promoted water status and  
446 photosynthetic capacity of gallic acid in soybean leaves. *J soil Sci plant Nutr.*  
447 2017;17.
44822. Haug A. Seasonal variations in the chemical composition of *Alaria esculenta*,  
449 *Laminaria saccharina*, *Laminaria hyperborea* and *Laminaria digitata* from northern  
450 Norway. Oslo; 1954.
45123. Wu Y-R, Lin Y-C, Chuang H. Laminarin modulates the chloroplast antioxidant  
452 system to enhance abiotic stress tolerance partially through the regulation of the  
453 defensin-like gene expression. *Plant Sci.* 2016 Jun 1;247:83–92.
45424. Dobromilska R, Mikiciuk M, Gubarewicz K. Evaluation of cherry tomato yielding  
455 and fruit mineral composition after using of Bio-algeen S-90 preparation. *J Elem.*  
456 2008;13(4):491–9.
45725. Jannin L, Arkoun M, Etienne P, Laîné P, Goux D, Garnica M, et al. *Brassica napus*  
458 growth is promoted by *Ascophyllum nodosum* (L.) le jol. seaweed extract: microarray  
459 analysis and physiological characterization of N, C, and S metabolisms. *J Plant*  
460 *Growth Regul.* 2013 Mar 15;32(1):31–52.
46126. Saa S, Olivos-Del Rio A, Castro S, Brown PH. Foliar application of microbial and  
462 plant based biostimulants increases growth and potassium uptake in almond (*Prunus*  
463 *dulcis* [Mill.] D. A. Webb). *Front Plant Sci.* 2015 Feb 23;6:87.
46427. Sabir A, Yazar K, Sabir F, Kara Z, Yazici MA, Goksu N. Vine growth, yield, berry  
465 quality attributes and leaf nutrient content of grapevines as influenced by seaweed  
466 extract (*Ascophyllum nodosum*) and nanosize fertilizer pulverizations. *Sci Hortic*  
467 (Amsterdam). 2014 Aug 15;175:1–8.
46828. Briat JF, Lobréaux S. Iron transport and storage in plants. *Trends Plant Sci.* 1997  
469 May 1;2(5):187–93.

47029. Blokhina O, Virolainen E, Fagerstedt K V. Antioxidants, oxidative damage and  
471 oxygen deprivation stress: A review. *Ann Bot.* 2003;91:179–94.
47230. Broadley M, Brown PIC, Rengel Z, Zhao F. Function of nutrients: micronutrients.  
473 In: Marschner P, editor. *Marschner's mineral nutrition of higher plants*. 3rd ed.  
474 Amsterdam: Elsevier; 2012. p. 191–248.
47531. Marschner H. Functions of mineral nutrients: micronutrients. In: Marschner H,  
476 editor. *Mineral nutrition of higher plants*. Cambridge: Academic Press; 1995. p.  
477 313–324.
47832. Goñi O, Fort A, Quille P, McKeown PC, Spillane C, O'Connell S. Comparative  
479 transcriptome analysis of two *Ascophyllum nodosum* extract biostimulants: Same  
480 seaweed but different. *J Agric Food Chem.* 2016 Apr 13;64(14):2980–9.
48133. Lötze E, Hoffman EW. Nutrient composition and content of various biological  
482 active compounds of three South African-based commercial seaweed biostimulants.  
483 *J Appl Phycol.* 2016 Apr 22;28(2):1379–86.
48434. Giannopolitis CN, Ries SK. Superoxide dismutases: I. Occurrence in higher plants.  
485 *Plant Physiol.* 1977 Feb 1;59(2):309–14.
48635. Aebi H. Catalase in vitro. *Methods Enzymol.* 1984 Jan 1;105:121–6.
48736. Sivasankari S, Venkatesalu V, Anantharaj M, Chandrasekaran M. Effect of seaweed  
488 extracts on the growth and biochemical constituents of *Vigna sinensis*. *Bioresour*  
489 *Technol.* 2006 Sep 1;97(14):1745–51.
49037. Roussos PA, Denaxa NK, Damvakaris T. Strawberry fruit quality attributes after  
491 application of plant growth stimulating compounds. *Sci Hortic (Amsterdam).* 2009  
492 Jan 6;119(2):138–46.
49338. Wally OSD, Critchley AT, Hiltz D, Craigie JS, Han X, Zaharia LI, et al. Regulation  
494 of phytohormone biosynthesis and accumulation in *Arabidopsis* following treatment  
495 with commercial extract from the marine macroalga *Ascophyllum nodosum*. *J Plant*  
496 *Growth Regul.* 2013 Jun 6;32(2):324–39.
49739. Rodríguez-Larramendi LA, González-Ramírez M, Gómez-Rincón MA, Guevara-  
498 Hernández F, Salas-Marina M, Gordillo-Curiel A. Effects of salicylic acid on the  
499 germination and initial growth of bean seedlings (*Phaseolus vulgaris* L.). *Rev la Fac*  
500 *Agron.* 2017;34:253–69.
50140. Reigosa MJ, Pazos-Malvido E. Phytotoxic effects of 21 plant secondary metabolites  
502 on *Arabidopsis thaliana* germination and root growth. *J Chem Ecol.* 2007 Jun  
503 26;33(7):1456–66.
50441. Hu X, Jiang X, Hwang H, Liu S, Guan H. Promotive effects of alginate-derived  
505 oligosaccharide on maize seed germination. *J Appl Phycol.* 2004;16(1):73–6.
50642. Natsume M, Kamo Y, Hirayama M, Adachi T. Isolation and characterization of  
507 alginate-derived oligosaccharides with root growth-promoting activities. *Carbohydr*  
508 *Res.* 1994 May 20;258:187–97.
50943. Iwasaki K, Matsubara Y. Purification of alginate oligosaccharides with root growth-  
510 promoting activity toward lettuce. *Biosci Biotechnol Biochem.* 2000 Jan  
511 22;64(5):1067–70.

51244. Xu X, Iwamoto Y, Kitamura Y, Oda T, Muramatsu T. Root growth-promoting  
513 activity of unsaturated oligomeric uronates from alginate on carrot and rice. Biosci  
514 Biotechnol Biochem. 2003 Jan 22;67(9):2022–5.
51545. Johnson TR, Kane ME. Differential germination and developmental responses of  
516 *Bletia purpurea* (orchidaceae) to mannitol and sorbitol in the presence of sucrose  
517 and fructose. J Plant Nutr. 2013 Jan;36(5):702–16.
51846. Vítová L, Stodůlková E, Bartoníčková A, Lipavská H. Mannitol utilisation by celery  
519 (*Apium graveolens*) plants grown under different conditions in vitro. Plant Sci. 2002  
520 Oct 1;163(4):907–16.
52147. Yvin J-C, Levasseur F, Amin-Gendy CPDC, Tran TKN, Patier P, Rochas C, et al.  
522 Laminarin as a seed germination and plant growth accelerator. France; 5750472,  
523 1993.
52448. Stevenson CC, Harrington GN. The impact of supplemental carbon sources on  
525 *Arabidopsis thaliana* growth, chlorophyll content and anthocyanin accumulation.  
526 Plant Growth Regul. 2009 Dec 13;59(3):255–71.
52749. Yücel NC, Heybet EH. Salicylic acid and calcium treatments improves wheat vigor,  
528 lipids and phenolics under high salinity. Acta Chim Slov. 2016 Dec 15;63(4):738–  
529 46.
53050. El-Esawi MA, Elansary HO, El-Shanhorey NA, Abdel-Hamid AME, Ali HM,  
531 Elshikh MS. Salicylic acid-regulated antioxidant mechanisms and gene expression  
532 enhance Rosemary performance under saline conditions. Front Physiol. 2017 Sep  
533 21;8:716.
53451. Youssef RA, El-Azab ME, Mahdy HAA, Essa EM, Mohammed KAS. Effect of  
535 salicylic acid on growth, yield, nutritional status and physiological properties of  
536 sunflower plant under salinity stress. Int J Pharm Phytopharm Res. 2017;7(5):54–8.
53752. Ma LJ, Li XM, Bu N, Li N. An alginate-derived oligosaccharide enhanced wheat  
538 tolerance to cadmium stress. Plant Growth Regul. 2010 Sep 13;62(1):71–6.
53953. Liu H, Zhang Y-H, Yin H, Wang W-X, Zhao X-M, Du Y-G. Alginate  
540 oligosaccharides enhanced *Triticum aestivum* L. tolerance to drought stress. Plant  
541 Physiol Biochem. 2013 Jan 1;62:33–40.
54254. Kaya C, Sonmez O, Aydemir S, Ashraf M, Dikilitas M. Exogenous application of  
543 mannitol and thiourea regulates plant growth and oxidative stress responses in salt-  
544 stressed maize (*Zea mays* L.). J Plant Interact. 2013 Sep;8(3):234–41.
54555. Chaney RL, Chen Y, Green CE, Holden MJ, Bell PF, Luster DG, et al. Root hairs  
546 on chlorotic tomatoes are an effect of chlorosis rather than part of the adaptive Fe-  
547 stress-response. J Plant Nutr. 1992 Oct 21;15(10):1857–75.
54856. Romheld V, Marschner H. Iron deficiency stress induced morphological and  
549 physiological changes in root tips of sunflower. Physiol Plant. 1981 Nov  
550 1;53(3):354–60.
55157. Pinton R, Cesco S, De Nobili M, Santi S, Varanini Z. Water- and pyrophosphate-  
552 extractable humic substances fractions as a source of iron for Fe-deficient cucumber  
553 plants. Biol Fertil Soils. 1997 Nov 28;26(1):23–7.



55458. Landsberg EC. Hormonal regulation of iron-stress response in sunflower roots: a  
555 morphological and cytological investigation. Protoplasma. 1996 Mar;194(1–2):69–  
556 80.
55759. Mugnai S, Azzarello E, Pandolfi C, Salamagne S, Briand X, Mancuso S.  
558 Enhancement of ammonium and potassium root influxes by the application of  
559 marine bioactive substances positively affects *Vitis vinifera* plant growth. J Appl  
560 Phicol. 2008 Apr 17;20(2):177–82.
56160. Nair P, Kandasamy S, Zhang J, Ji X, Kirby C, Benkel B, et al. Transcriptional and  
562 metabolomic analysis of *Ascophyllum nodosum* mediated freezing tolerance in  
563 *Arabidopsis thaliana*. BMC Genomics. 2012 Nov 21;13(1):643.
56461. Blunden G, Jenkins T, Liu Y-W. Enhanced leaf chlorophyll levels in plants treated  
565 with seaweed extract. J Appl Phicol. 1996 Nov;8(6):535–43.
56662. Carrasco-Gil S, Hernandez-Apaolaza L, Lucena JJ. Effect of several commercial  
567 seaweed extracts in the mitigation of iron chlorosis of tomato plants (*Solanum*  
568 *lycopersicum* L.). Plant Growth Regul. 2018 Dec 6;86(3):401–11.
56963. Singh A, Gupta R, Pandey R. Exogenous application of rutin and gallic acid regulate  
570 antioxidants and alleviate reactive oxygen generation in *Oryza sativa* L. Physiol Mol  
571 Biol Plants. 2017 Apr 29;23(2):301–9.
57264. Wang J, Wang K, Zhang Q, Zhu Y, Jiang L. Inhibition of laminarin against TMV  
573 and effect on protective enzymes in tobacco. Acta Phytopylacica Sin. 2011.
57465. Ranieri A, Castagna A, Baldan B, Soldatini GF. Iron deficiency differently affects  
575 peroxidase isoforms in sunflower. J Exp Bot. 2001 Jan 1;52(354):25–35.
57666. Sun B, Jing Y, Chen K, Song L, Chen F, Zhang L. Protective effect of nitric oxide  
577 on iron deficiency-induced oxidative stress in maize (*Zea mays*). J Plant Physiol.  
578 2007 May 3;164(5):536–43.
57967. Sun C, Wu T, Zhai L, Li D, Zhang X, Xu X, et al. Reactive oxygen species function  
580 to mediate the Fe deficiency response in an Fe-efficient apple genotype: an early  
581 response mechanism for enhancing reactive oxygen production. Front Plant Sci.  
582 2016;7:1726.
58368. Mittler R. Oxidative stress, antioxidants and stress tolerance. Trends Plant Sci. 2002  
584 Sep 1;7(9):405–10.
58569. Iturbe-Ormaetxe I, Moran JF, Arrese-Igor C, Gogorcena Y, Klucas RV, Becana M.  
586 Activated oxygen and antioxidant defences in iron-deficient pea plants. Plant, Cell  
587 Environ. 1995 Apr 1;18(4):421–9.
58870. Molassiotis A, Tanou G, Diamantidis G, Patakas A, Therios I. Effects of 4-month Fe  
589 deficiency exposure on Fe reduction mechanism, photosynthetic gas exchange,  
590 chlorophyll fluorescence and antioxidant defense in two peach rootstocks differing  
591 in Fe deficiency tolerance. J Plant Physiol. 2006 Feb 1;163(2):176–85.
59271. M’selli W, Houmani H, Donnini S, Zocchi G, Abdelly C, Gharsalli M. Iron  
593 deficiency tolerance at leaf level in *Medicago ciliaris* plants. Am J Plant Sci. 2014  
594 Jul 30;05(16):2541–53.
59572. Fike JH, Allen VG, Schmidt RE, Zhang X, Fontenot JP, Bagley CP, et al. Tasco-

- 596 Forage: I. Influence of a seaweed extract on antioxidant activity in tall fescue and in  
597 ruminants. J Anim Sci. 2001 Apr;79(4):1011–21.
59873. Chen YE, Cui JM, Li GX, Yuan M, Zhang ZW, Yuan S, et al. Effect of salicylic  
599 acid on the antioxidant system and photosystem II in wheat seedlings. Biol Plant.  
600 2016 Jan 18;60(1):139–47.
60174. Zhang X. Influence of plant growth regulators on turfgrass growth, antioxidant  
602 status, and drought tolerance. 1997 Jul 1.
60375. Mansori M, Chernane H, Latique S, Benaliat A, Hsissou D, El Kaoua M. Seaweed  
604 extract effect on water deficit and antioxidative mechanisms in bean plants  
605 (*Phaseolus vulgaris* L.). J Appl Phycol. 2015 Aug 11;27(4):1689–98.
60676. Song Y, Dong Y, Kong J, Tian X, Bai X, Xu L. Effects of root addition and foliar  
607 application of nitric oxide and salicylic acid in alleviating iron deficiency induced  
608 chlorosis of peanut seedlings. J Plant Nutr. 2017 Jan 2;40(1):63–81.
60977. Chandrakar V, Dubey A, Keshavkant S. Modulation of antioxidant enzymes by  
610 salicylic acid in arsenic exposed *Glycine max* L. J soil Sci plant Nutr.  
611 2016;16(3):662–76.
61278. Janda T, Szalai G, Tari I, Páldi E. Hydroponic treatment with salicylic acid  
613 decreases the effects of chilling injury in maize (*Zea mays* L.) plants. Planta. 1999  
614 Apr 21;208(2):175–80.
61579. Kang HM, Saltveit ME. Chilling tolerance of maize, cucumber and rice seedling  
616 leaves and roots are differentially affected by salicylic acid. Physiol Plant. 2002 Aug  
617 1;115(4):571–6.
- 618

**Table 1** Organic compound concentration (mg/L) of salicylic acid (SA), gallic acid (GA), sodium alginate (SoA), mannitol (MA), laminarin (LA) and fucose (FU) applied in seeds and tomato plants.

622  
623

| Organic compound | Concentration (mg/L) |      |     |
|------------------|----------------------|------|-----|
|                  | x1/10                | x1   | x10 |
| SA               | 4,7                  | 47   | 470 |
| GA               | 4,7                  | 47   | 470 |
| SoA              | 9,0                  | 90   | 900 |
| MA               | 5,8                  | 58   | 580 |
| LA               | 0,070                | 0,70 | 7,0 |
| FU               | 3,1                  | 31   | 310 |



**Table 2** Germination (%) at day 2 after organic compounds (salicylic acid (SA), gallic acid (GA), sodium alginate (SoA), mannitol (MA), laminarin (LA) and fucose (FU)) application at three concentrations (x1/10; x1 and x10). A control (C) treatment without organic compound application was performed.

628

| Organic compound | Germination (%) |       |    |     |
|------------------|-----------------|-------|----|-----|
|                  | C               | x1/10 | x1 | x10 |
| <b>SA</b>        | 0               | 6     | 0  | 0   |
| <b>GA</b>        | 0               | 37    | 25 | 6   |
| <b>SoA</b>       | 0               | 12    | 0  | 25  |
| <b>MA</b>        | 0               | 12    | 25 | 25  |
| <b>LA</b>        | 0               | 12    | 6  | 19  |
| <b>FU</b>        | 0               | 6     | 6  | 6   |

**Fig 1** Growth promotion (+%) or growth inhibition (-%) root seedlings at day 3, 4, 5 and 7 after organic compounds (salicylic acid (SA), gallic acid (GA), sodium alginate (SoA), mannitol (MA), laminarin (LA) and fucose (FU)) application at three concentrations ( $x1/10$ ;  $x1$  and  $x10$ ) with respect to the untreated control. Data are means  $\pm$  SE (n=3). Increases or decreases  $> 40\%$  are indicated by asterisk (\*).

634

**Fig 2** Fresh weight of new and developed leaves, stem and root of tomato plants treated with organic compounds (salicylic acid (SA), gallic acid (GA), sodium alginate (SoA), mannitol (MA), laminarin (LA) and fucose (FU)) at two concentrations ( $x1/10$  and  $x1$ ) and after 6 days of Fe deficiency. A control (C) treatment without organic compound application was performed. Data are means  $\pm$  SE (n=3). Significant differences between treatments ( $P < 0.10$ ) are indicated by different letter (regular letters for  $x1/10$ ; cursive bold letters for  $x1$ ). Not significant differences between treatments are indicated by n.s.

642

**Fig 3** Root morphology of tomato plants treated with organic compounds (salicylic acid (SA), gallic acid (GA), sodium alginate (SoA), mannitol (MA), laminarin (LA) and fucose (FU)) at two concentrations ( $x1/10$  and  $x1$ ) after 0 and 6 days of Fe deficiency. A control (C) treatment without organic compound application was performed.

647

**Fig 4** SPAD (chlorophyll index) in new leaves of tomato plants treated with organic compounds (salicylic acid (SA), gallic acid (GA), sodium alginate (SoA), mannitol (MA), laminarin (LA) and fucose (FU)) at two concentrations ( $x1/10$  and  $x1$ ) at day 0, 3 and 5 of Fe deficiency. A control (C) treatment without organic compound application was performed. Data are means  $\pm$  SE (n=3). Significant differences between treatments ( $P < 0.10$ ) with respect to the control are indicated by asterisk (\*).

**Fig 5** Oxidative stress indexes (SOD and CAT activity) of root and new leaves of tomato plants treated with organic compounds (salicylic acid (SA), gallic acid (GA), sodium alginate (SoA), mannitol (MA), laminarin (LA) and fucose (FU)) at two concentrations (x1/10 and x1) and after 6 days of Fe deficiency. A control (C) treatment without organic compound application was performed. Data are means  $\pm$  SE (n=3). Significant differences between treatments ( $P < 0.10$ ) are indicated by different letter (regular letters for x1/10; cursive bold letters for x1). Not significant differences between treatments are indicated by n.s.

662

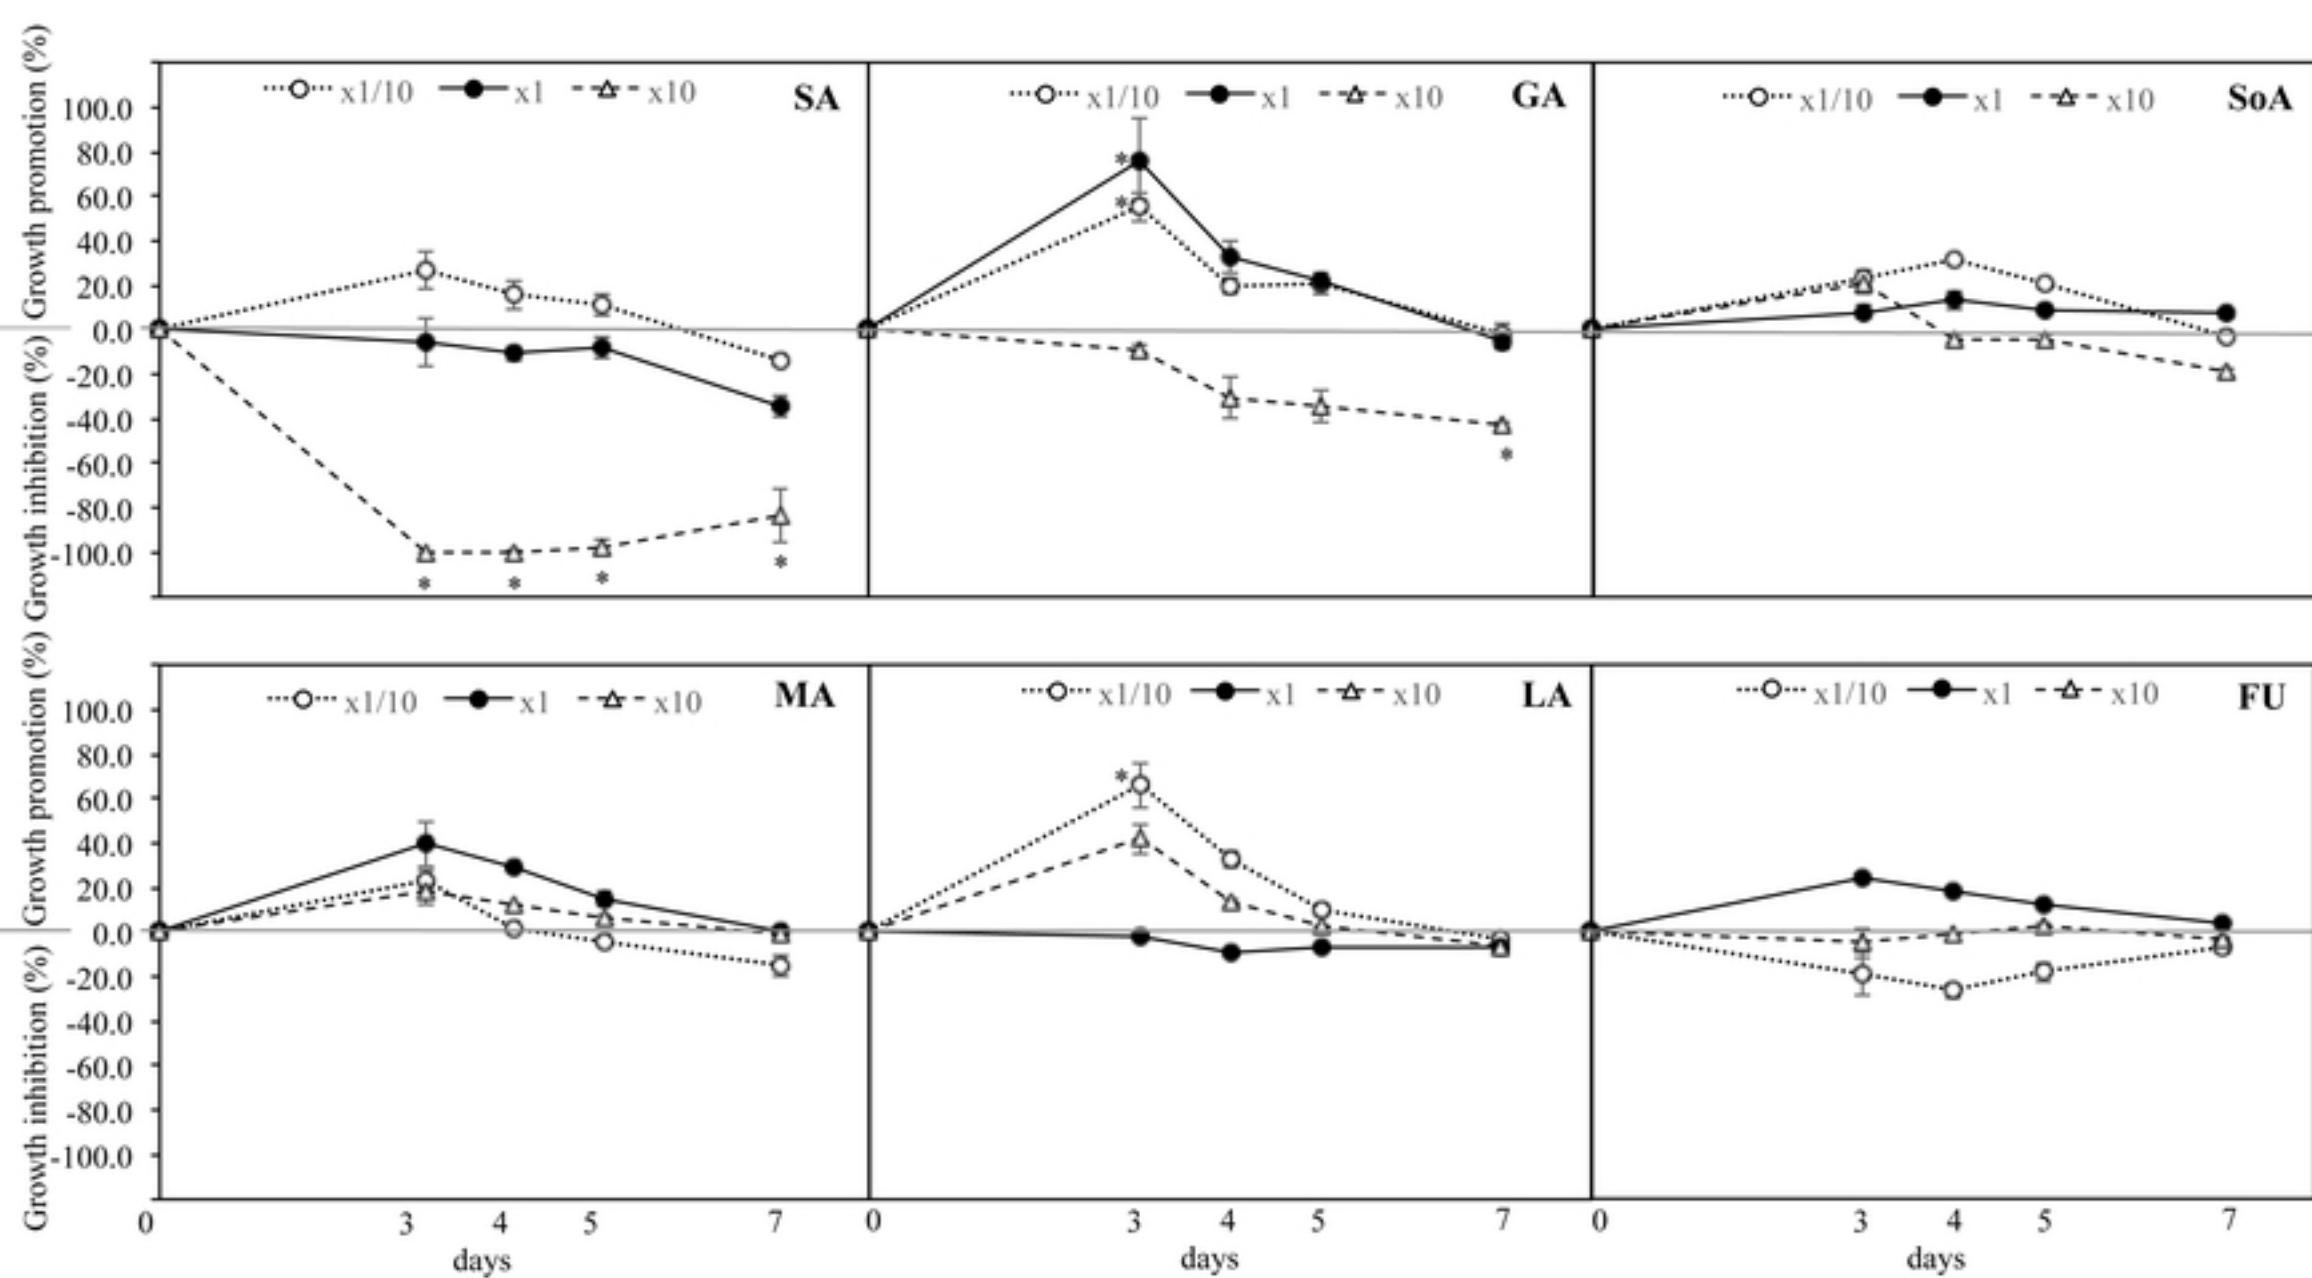

Figure 1

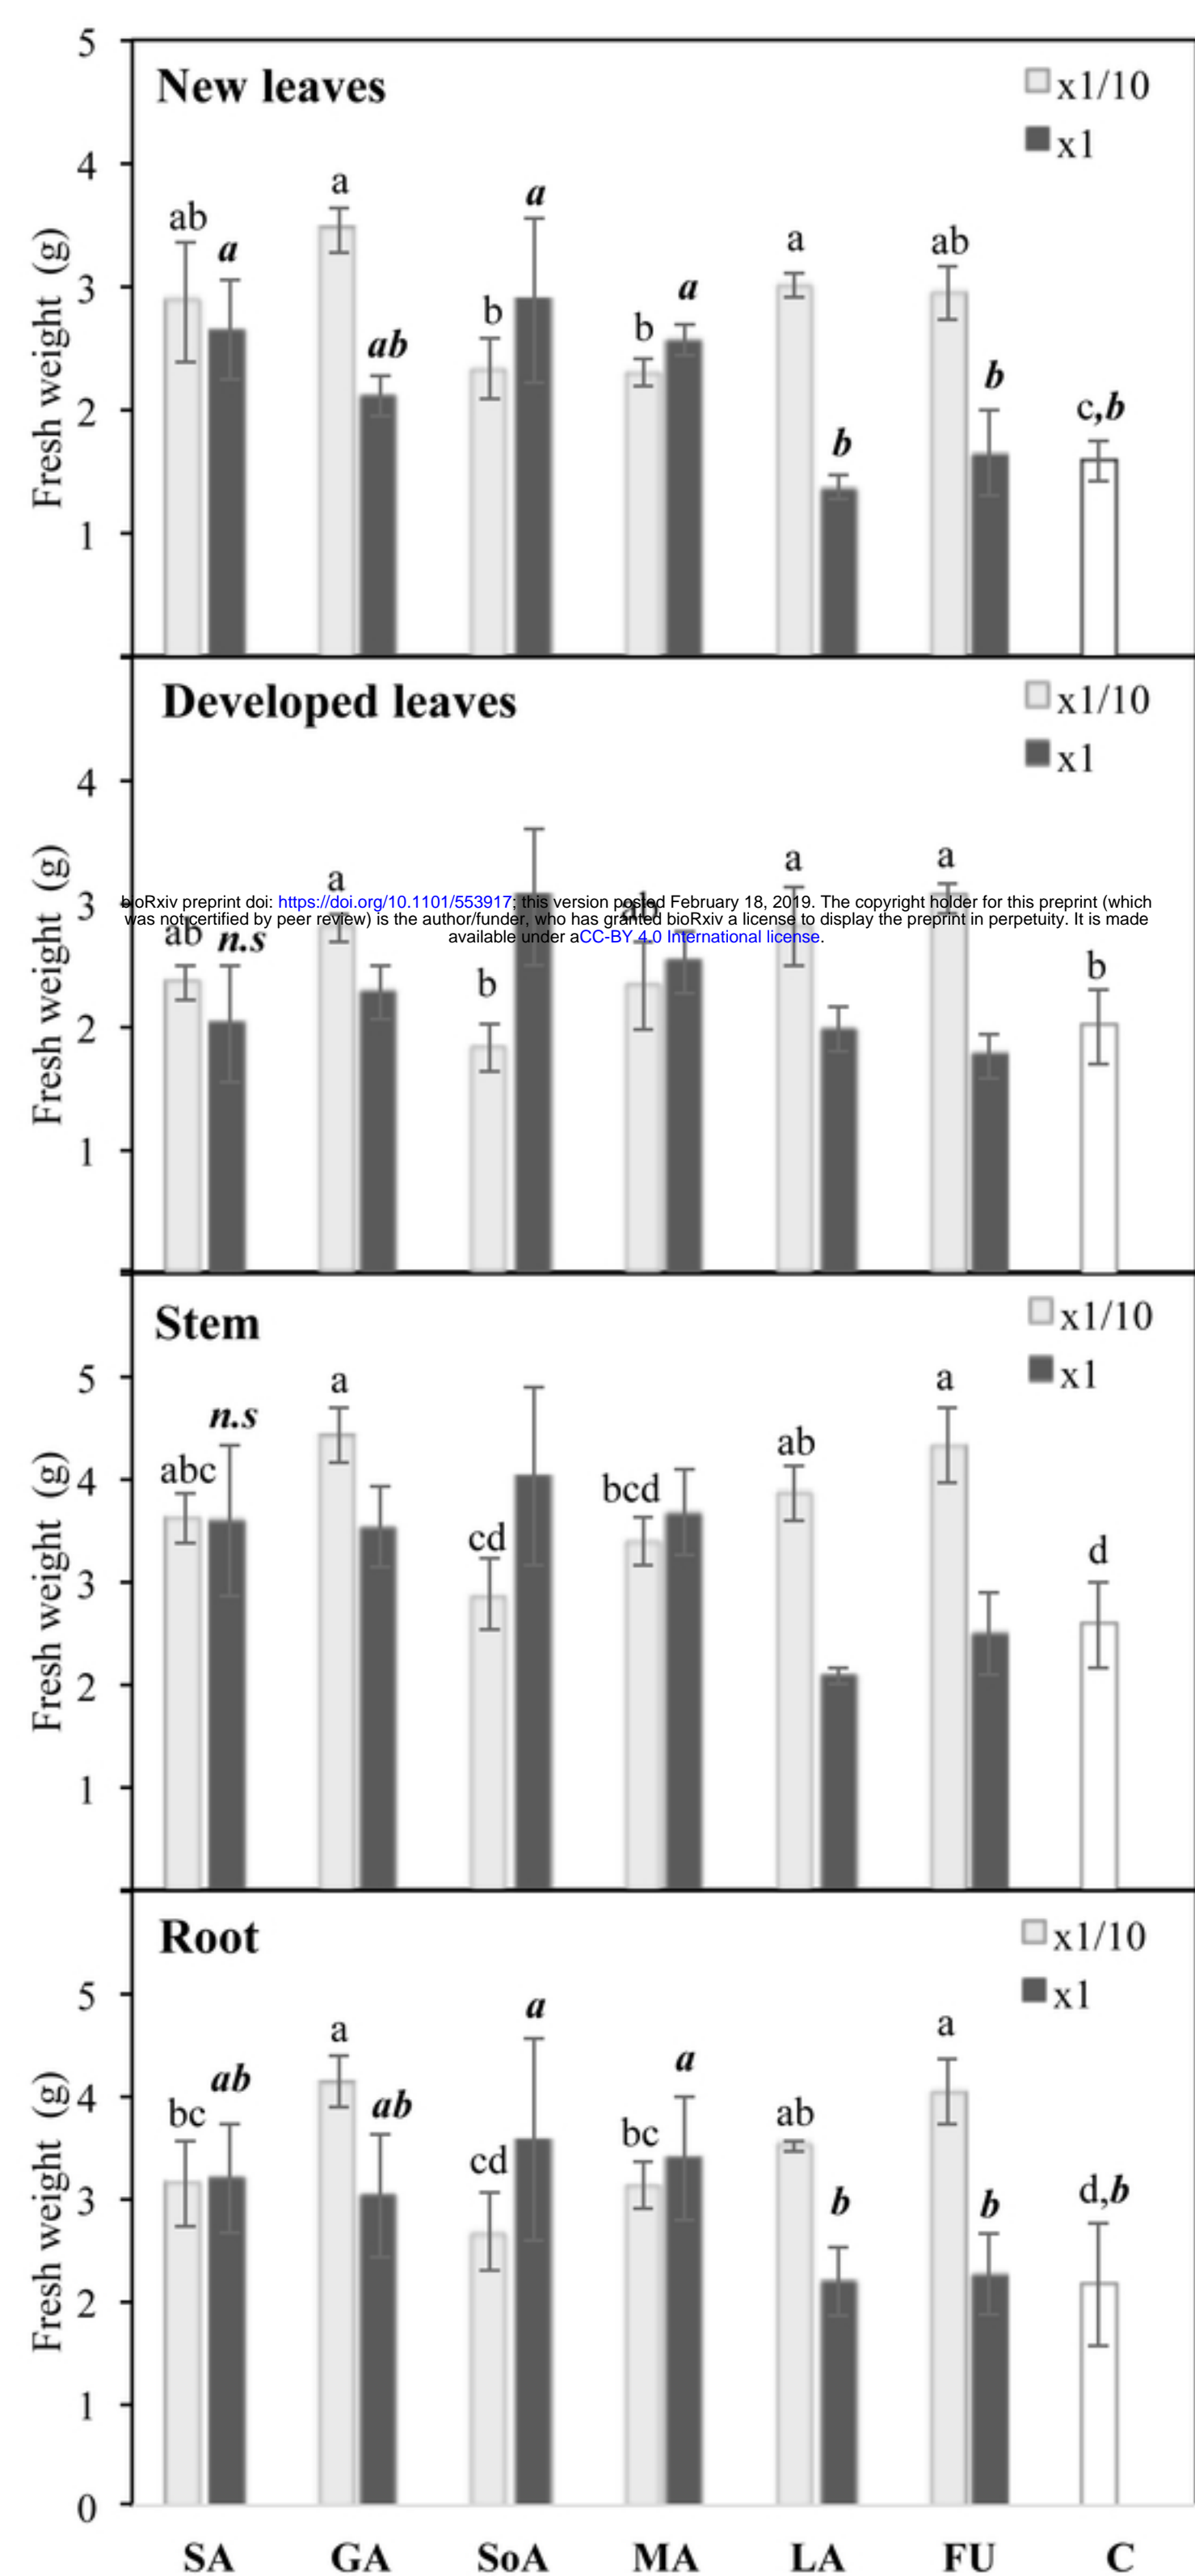

Figure 2



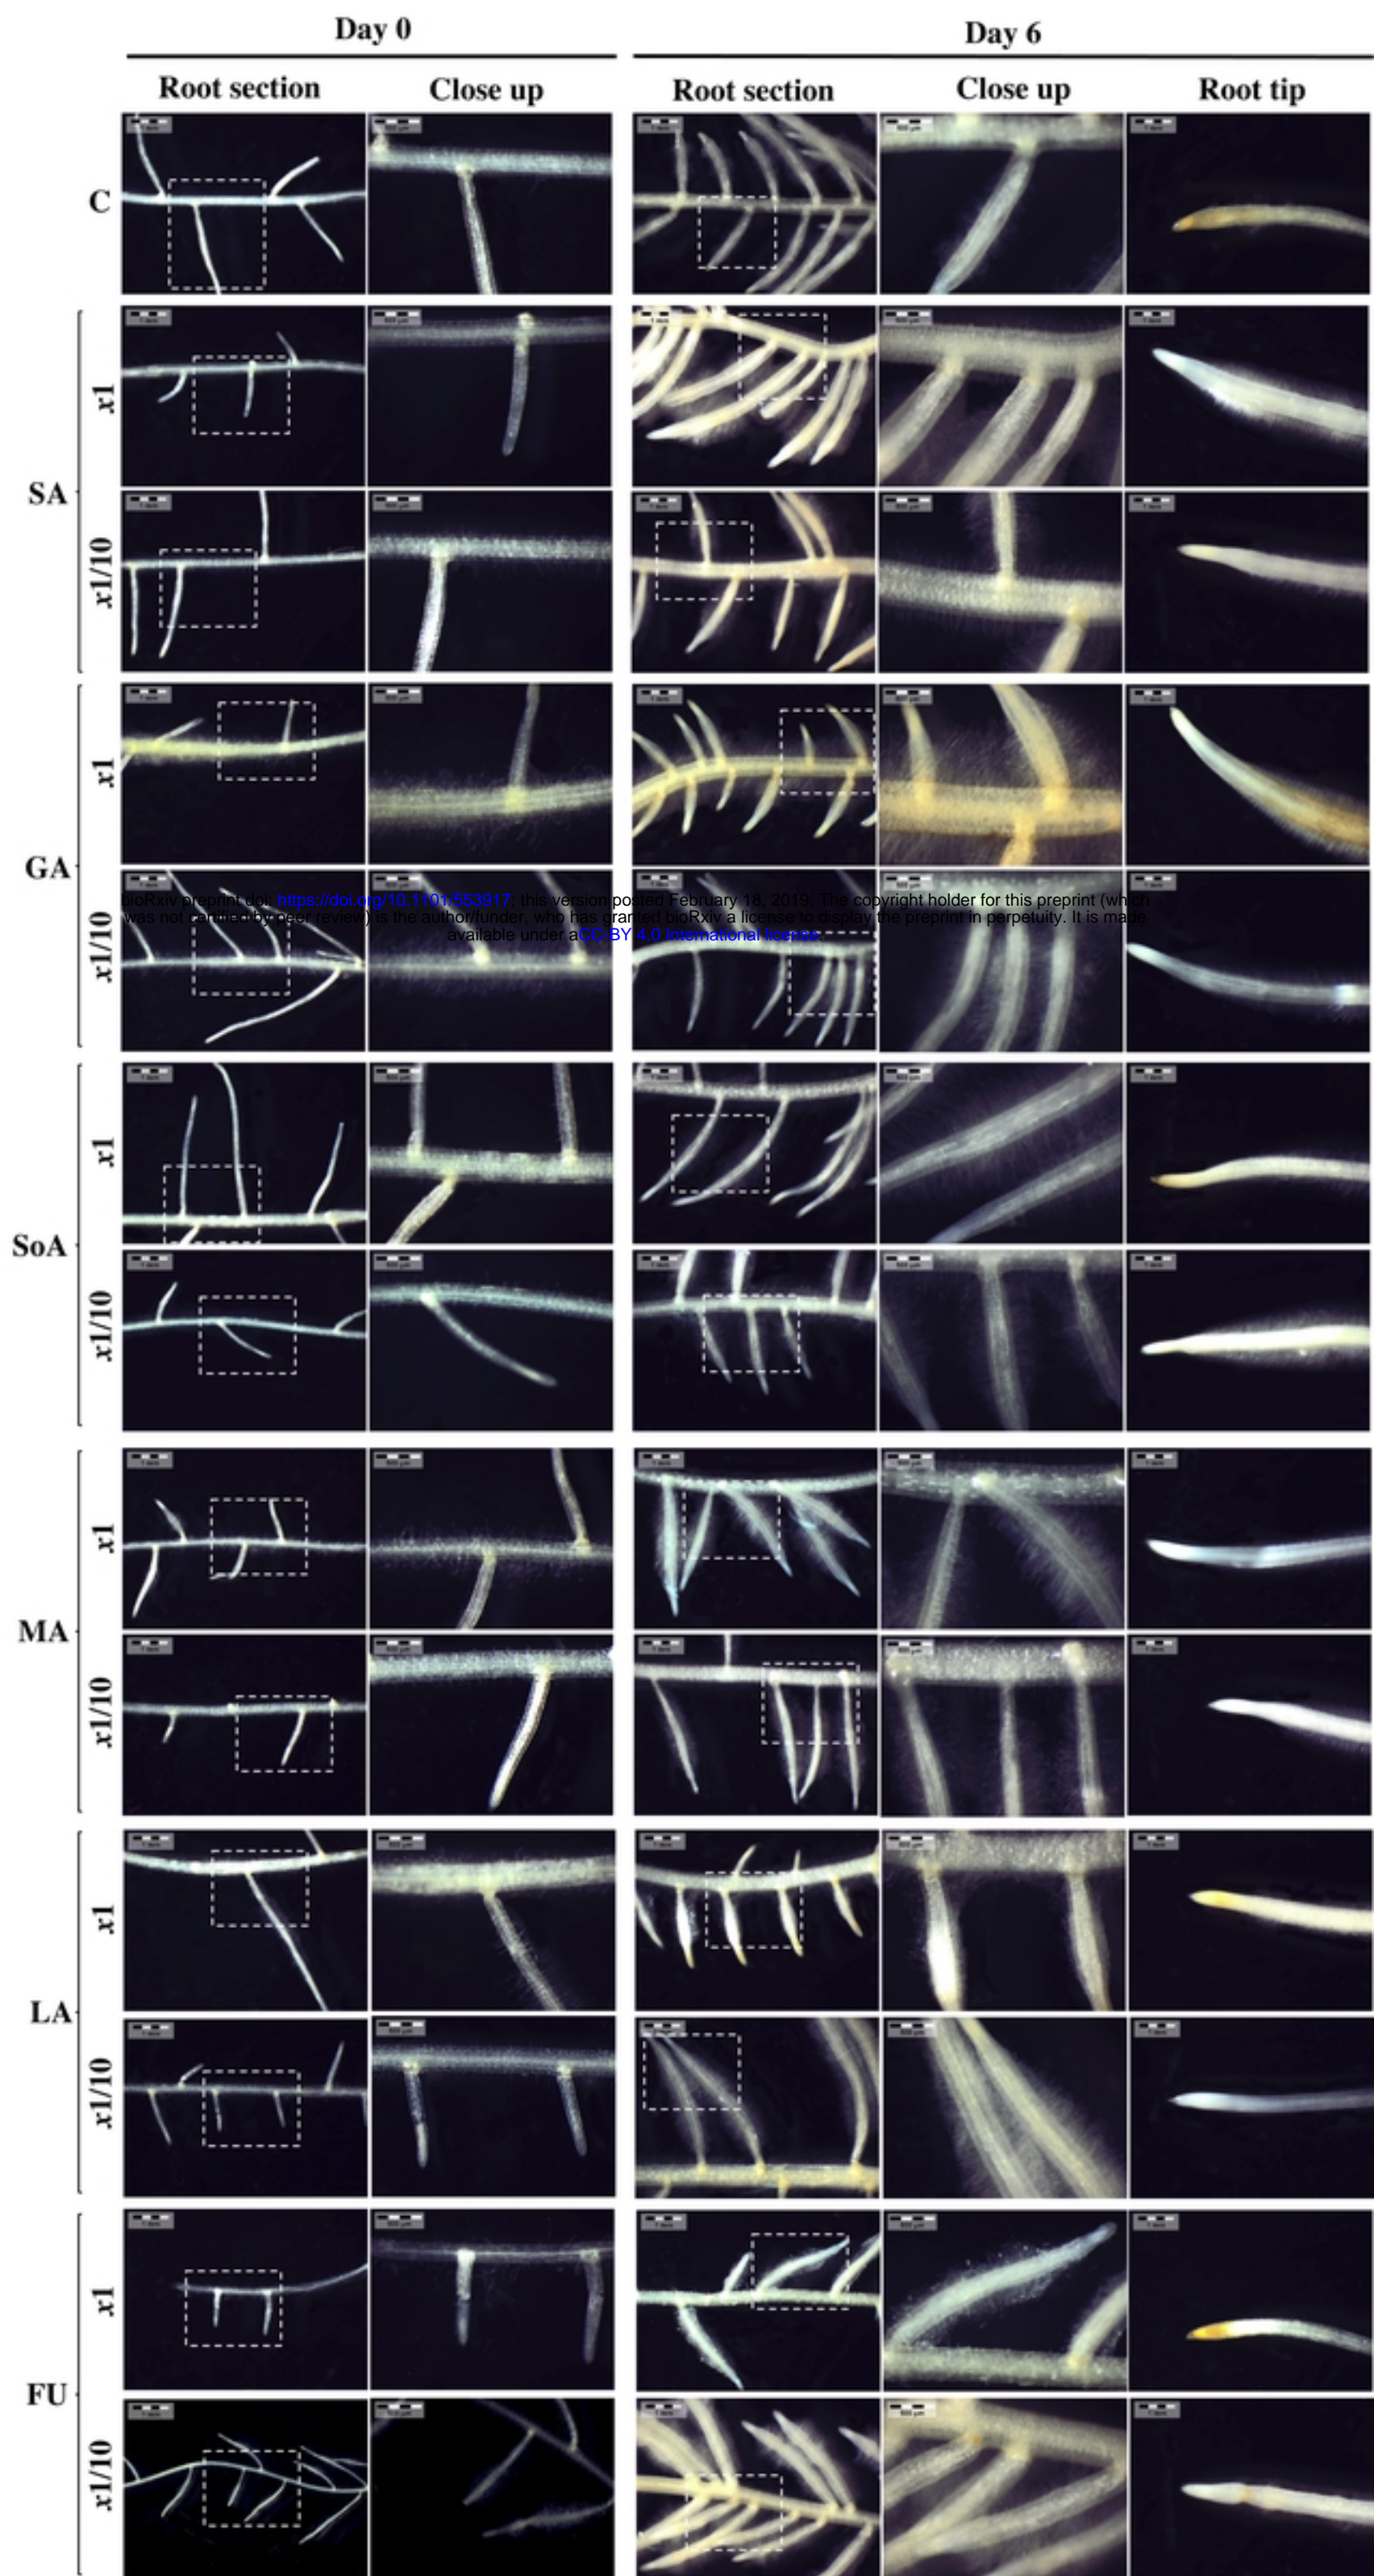

Figure 3



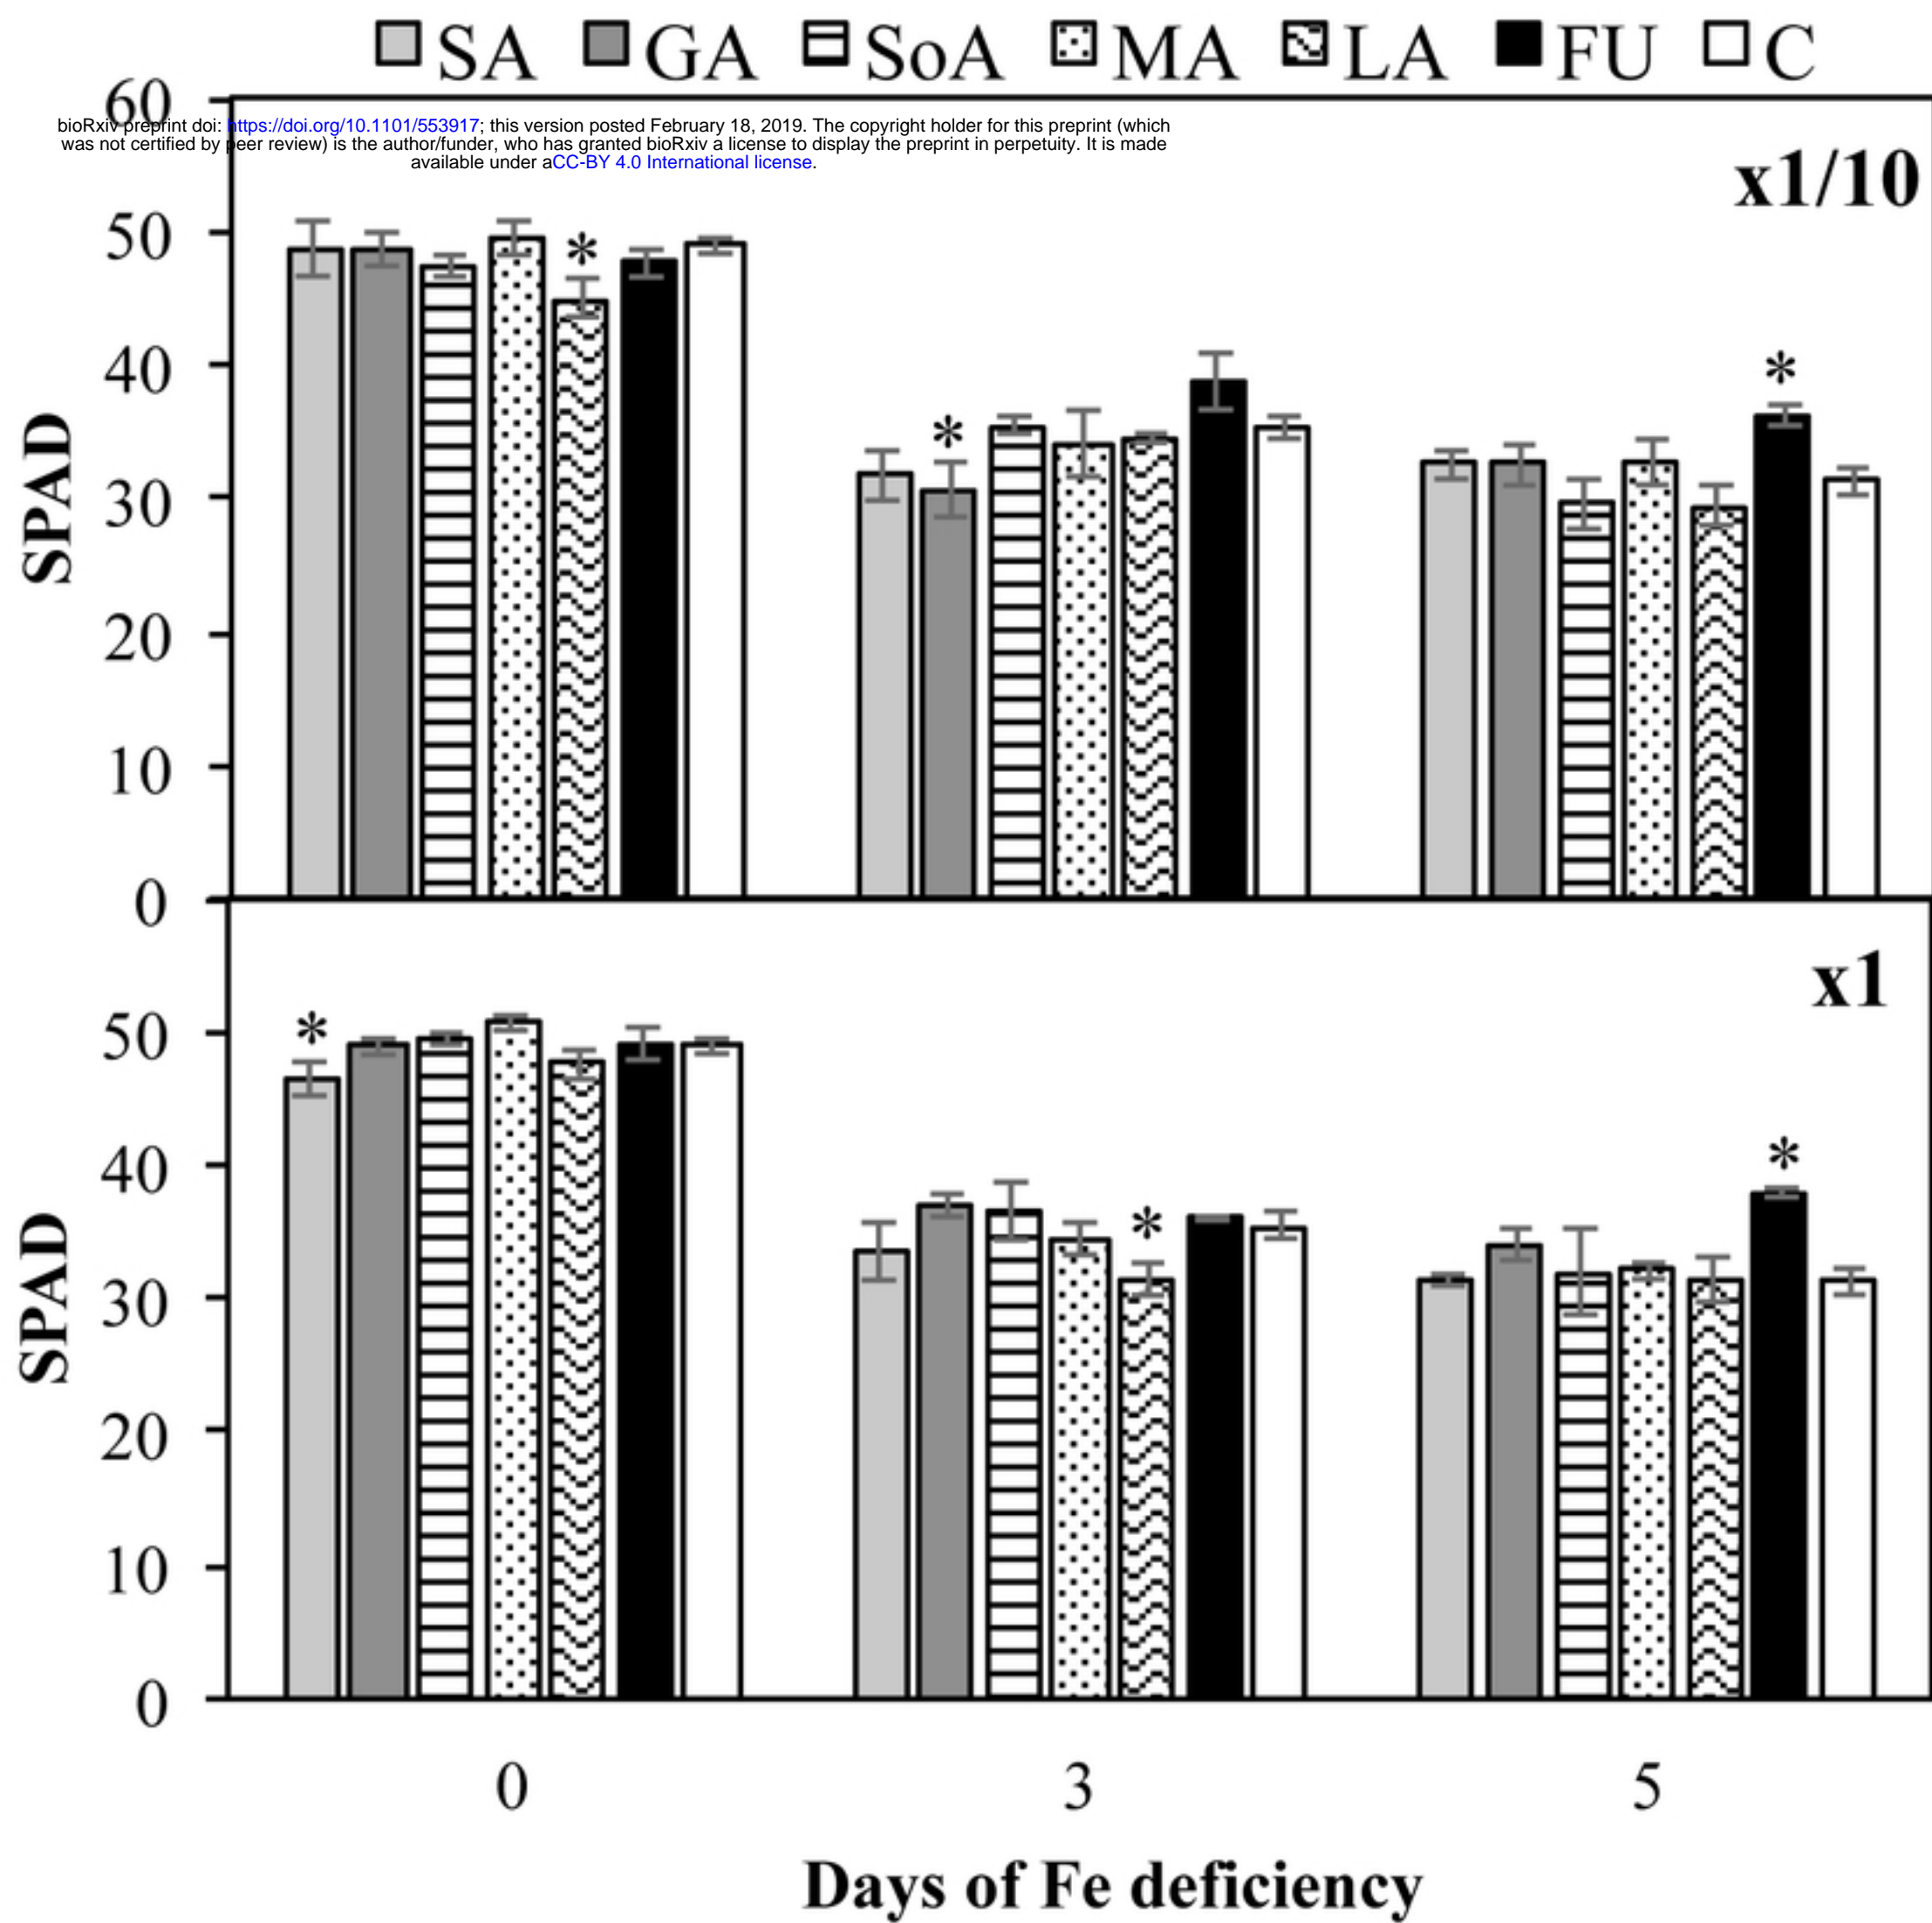

Figure 4

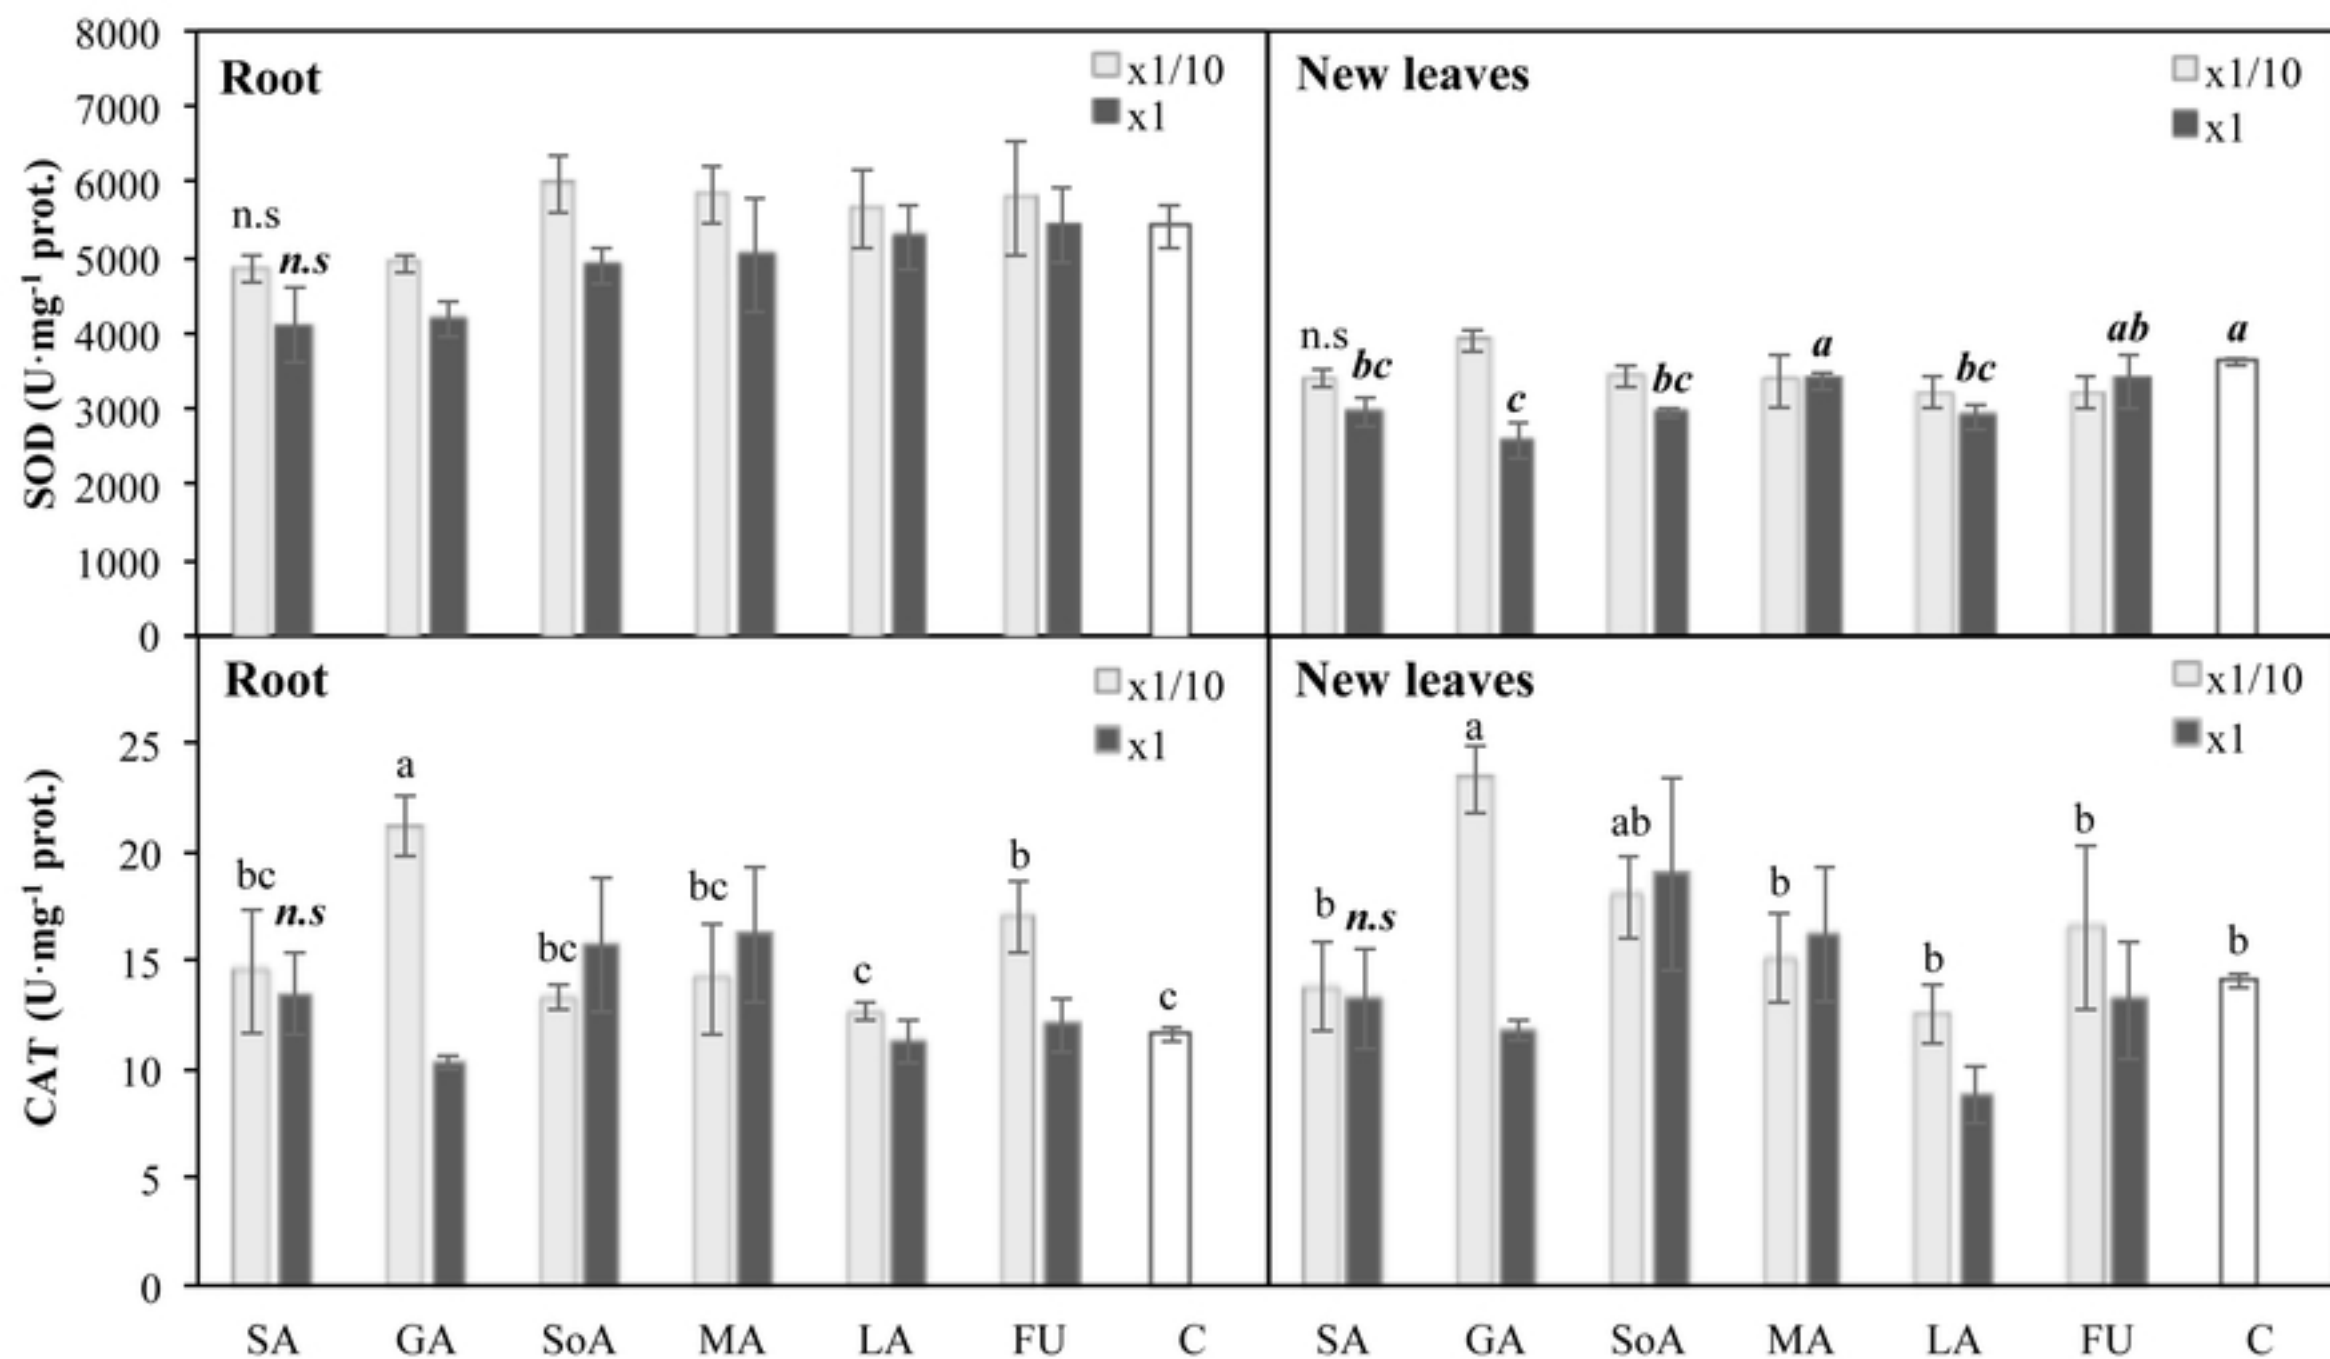

Figure 5
